# Supplementary material for: Intestinal and Mucosal Microbiome Response to Oral Challenge of Enterotoxigenic Escherichia coli in Weaned Pigs
Source: MDPI journal article supplement (doi:10.3390/pathogens11020160), 2022-01-26
Supplement: s1 [file s1]

**Table S1.** The ingredient composition and nutrient levels of the diet.

| Ingredients                      | Percentage (%) |
|----------------------------------|----------------|
| Corn                             | 51.59          |
| Dehulled soybean meal (46%CP)    | 16.00          |
| Fermented soybean meal           | 10.00          |
| Deproteinized whey powder (2%CP) | 8.00           |
| Fish meal (62.5 %CP)             | 2.50           |
| Formula                          | 2.00           |
| Soyabean oil                     | 2.00           |
| Sucrose                          | 2.00           |
| Glucose                          | 2.00           |
| L-Lys.HCL (98%)                  | 0.58           |
| DL-Met (98.5%)                   | 0.25           |
| L-Thr (98%)                      | 0.22           |
| L-Trp (98%)                      | 0.05           |
| Choline chloride (50%)           | 0.16           |
| CaCO <sub>3</sub>                | 1.00           |
| CaHPO <sub>4</sub> , 17/21       | 0.80           |
| Salt                             | 0.40           |
| Zinc Oxide                       | 0.20           |
| Mineral mixture†                 | 0.20           |
| Vitamin mixture‡                 | 0.05           |
| Total                            | 100.00         |
| Nutrient Level                   |                |
| Digestible energy (Mcal/kg)      | 3.56           |
| Crude protein %                  | 19.74          |
| Calcium %                        | 0.80           |
| Total phosphorus %               | 0.57           |
| Available phosphorus %           | 0.41           |
| SID Lys %                        | 1.43           |
| SID Met %                        | 0.54           |
| SID Met + Cys %                  | 0.78           |
| SID Thr %                        | 0.83           |
| SID Trp %                        | 0.22           |

CP crude protein; SID standard ileal digestibility

† the mineral premixture provided the following minerals per kg of complete diet: Fe, 100 mg; Cu, 150 mg; Zn, 100 mg; Mn, 20 mg; iodine, 0.3 mg; Se, 0.3 mg.

‡ the vitamin premixture provided the following vitamins per kg of complete diet: Vitamin A,

9000IU; Vitamin D3, 3000IU; Vitamin E, 20IU; Vitamin K3, 3.0mg; Vitamin B1, 1.5mg; Vitamin B2, 4.0mg; Vitamin B6, 3.0mg; Vitamin B12, 0.2mg; nicotinic acid, 30.0 mg; pantothenic acid, 15.0 mg; folic acid, 0.75 mg; biotin, 0.1 mg.

**Table S2.** Predesigned primers of selected genes tested by quantitative RT-qPCR.

| Gene           |         | Primer (5'-3')          | Product length (bp) | Gene Bank accession |
|----------------|---------|-------------------------|---------------------|---------------------|
| ASBT           | Forward | AGGTTGGATCCATCACAGGC    | 134                 | NM_001244463.1      |
|                | Reverse | GGAGTAACCGGCCAAAGGAA    |                     |                     |
| IL-18          | Forward | AGCTGAAAACGATGAAGACCTG  | 121                 | NM_213997.1         |
|                | Reverse | AAACACGGCTTGATGTCCCT    |                     |                     |
| TLR-9          | Forward | AATCCAGTCGGAGATGTTTGCT  | 79                  | AY859728            |
|                | Reverse | GACCGCCTGGGAGATGCT      |                     |                     |
| MyD88          | Forward | GTGCCGTCGGATGGTAGTG     | 65                  | NM001099923         |
|                | Reverse | TCTGGAAGTCACATTCCTTGCTT |                     |                     |
| SIGIRR         | Forward | ACCTGGGCTCCCGAAACTAC    | 62                  | AK239384.1          |
|                | Reverse | GTCATCTTCTGACACCAGGCAAT |                     |                     |
| $\beta$ -actin | Forward | GGCGCCCAGCACGAT         | 66                  | DQ845171.1          |

**Table S2.** Continued.

| Gene    | Primer (5'–3')                | Product length (bp) | Gene Bank accession |
|---------|-------------------------------|---------------------|---------------------|
| β-actin | Reverse CCGATCCACACGGAGTACTTG |                     |                     |

ASBT apical sodium-dependent bile acid transporter; IL-18, interleukin-18; TLR9 Toll-like receptor9; MyD88, myeloid differentiation factor 88; SIGIRR, Single Ig And TIR Domain Containing; HIF, hypoxia inducible factor.

**Table S3.** Primers used to amplify 16S rRNA gene.

| Sample ID |         | Primer (5'–3')   |
|-----------|---------|------------------|
| CON 1     | Forward | ACAGTCGAGCGCTGCG |
|           | Reverse | GTATGTGAGAGAGCGC |
| CON 2     | Forward | ACACTAGATCGCGTGT |
|           | Reverse | GTATGTGAGAGAGCGC |
| CON 3     | Forward | CACGACACGACGATGT |
|           | Reverse | CACGCGACGCTCTCTA |
| CON 4     | Forward | CGCATGACACGTGTGT |
|           | Reverse | GTATGTGAGAGAGCGC |
| CON 5     | Forward | CACTCACGTGTGATAT |
|           | Reverse | CACGCGACGCTCTCTA |
| CON 6     | Forward | CACGACACGACGATGT |
|           | Reverse | GTATGTGAGAGAGCGC |
| CON 7     | Forward | CATGTAGAGCAGAGAG |
|           | Reverse | CACGCGACGCTCTCTA |
| ETEC 1    | Forward | CACTCACGTGTGATAT |

**Table S3.** Continued.

---

|        |         |                  |
|--------|---------|------------------|
|        | Reverse | GTATGTGAGAGAGCGC |
| ETEC 2 | Forward | CATGTAGAGCAGAGAG |
|        | Reverse | GTATGTGAGAGAGCGC |
| ETEC 3 | Forward | CACTCGACTCTCGCGT |
|        | Reverse | CACGCGACGCTCTCTA |
| ETEC 4 | Forward | TCTGTATCTCTATGTG |
|        | Reverse | CACGCGACGCTCTCTA |
| ETEC 5 | Forward | ACAGTCGAGCGCTGCG |
|        | Reverse | CACGCGACGCTCTCTA |
| ETEC 6 | Forward | ACACTAGATCGCGTGT |
|        | Reverse | CACGCGACGCTCTCTA |
| ETEC 7 | Forward | CGCATGACACGTGTGT |
|        | Reverse | CACGCGACGCTCTCTA |

---
